# Supplementary material for: TDP2 suppresses chromosomal translocations induced by DNA topoisomerase II during gene transcription
Source: PubMed Central journal article supplement (PMC5550487; doi:10.1038/s41467-017-00307-y), 2017-08-10
Supplement: 41467_2017_307_MOESM1_ESM.pdf [file 41467_2017_307_MOESM1_ESM.pdf]

File Name: Supplementary Information

Description: Supplementary Figures and Supplementary Tables

File Name: Peer Review File

Description:

| Cell Type | treatment | No. Cells | Chromos-type (freq. per cell) |        |             | Chromatid-type (freq. per cell) |        |      |             | Total       |
|-----------|-----------|-----------|-------------------------------|--------|-------------|---------------------------------|--------|------|-------------|-------------|
|           |           |           | Exchange                      | Breaks | Total       | Exchange                        | Breaks | Gaps | Total       |             |
| normal    | DMSO      | 49        | 0.08                          | 0      | <b>0.08</b> | 0.02                            | 0.06   | 0.02 | <b>0.10</b> | <b>0.18</b> |
| normal    | Etop.     | 50        | 0.04                          | 0.08   | <b>0.12</b> | 0.08                            | 0.16   | 0.04 | <b>0.28</b> | <b>0.40</b> |
| patient   | DMSO      | 50        | 0.06                          | 0.04   | <b>0.10</b> | 0                               | 0.02   | 0.02 | <b>0.04</b> | <b>0.14</b> |
| patient   | Etop.     | 53        | 0.13                          | 0.30   | <b>0.43</b> | 0.36                            | 2.83   | 0.34 | <b>3.53</b> | <b>3.96</b> |

**Supplementary Figure 1.** Chromosome and chromatid type aberrations in normal and TDP2 patient lymphoblastoid cells. Chromosome aberrations were scored by M-FISH karyotyping of control and TDP2 patient cells following continuous treatment with 50nM etoposide for 20 hr. Frequencies are the total number of the indicated event per metaphase. Statistical significance by ANOVA (Tukey simultaneous test). *ns*, not significant; \*\*\* P<0.005.

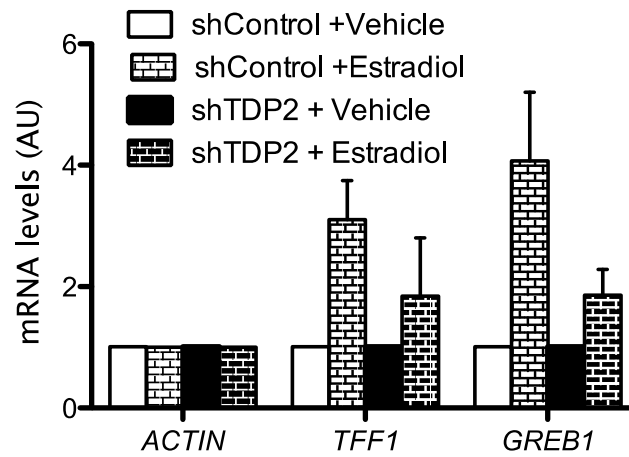

**Supplementary Figure 2.** ER-dependent gene induction by  $17\beta$ -estradiol. mRNA levels for two ER-responsive genes in mock-depleted (Mock KD) or TDP2-depleted (TDP2 KD) MCF7 cells before and 12 hours after stimulation with 100nM  $17\beta$ -estradiol. mRNA levels were quantified by qRT-PCR and are expressed as arbitrary units (AU) normalized first to *ACTB* levels under the same experimental condition and then to the levels of the relevant gene of interest under control conditions without hormone. Data are the mean ( $\pm$  s.e.m.) of four independent experiments.

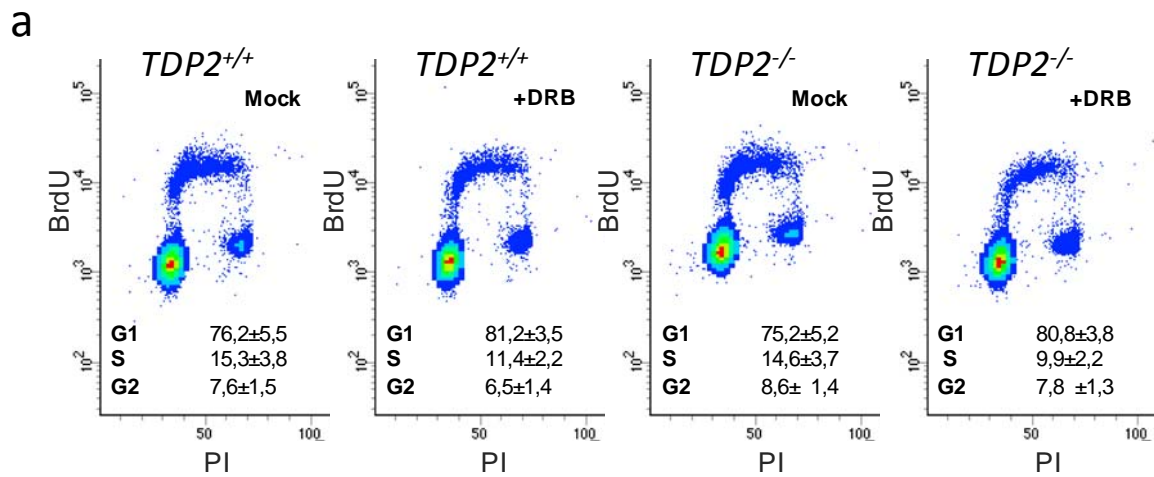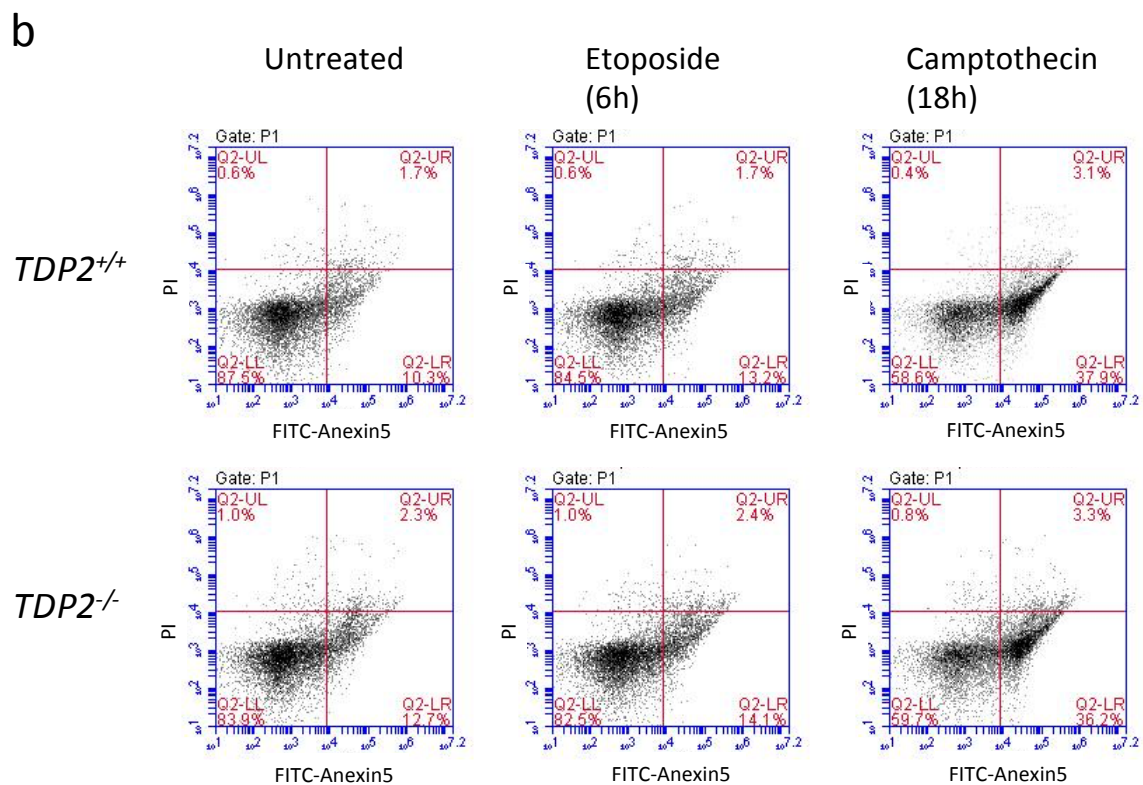

**Supplementary Figure 3.** FACS analysis of exponentially growing wild type and *TDP2*<sup>-/-</sup> RPE-1 cells. **a.** Cells were mock-treated (DMSO) or treated with DRB (100µM) for 3 hr. Cells were pulse labelled for 15 min with BrdU for subsequent cell cycle analysis. Data are the mean (± s.e.m.) of three independent experiments. **b.** Cells were mock-treated (DMSO) or treated with etoposide (100µM) for 6 hr. Cells were trypsinized and phosphatidylserine exclusion (as a marker of early apoptosis) measured by Anexin5 (FITC) staining. Cells treated with camptothecin (10µM for 18 hr) were employed as a positive control.

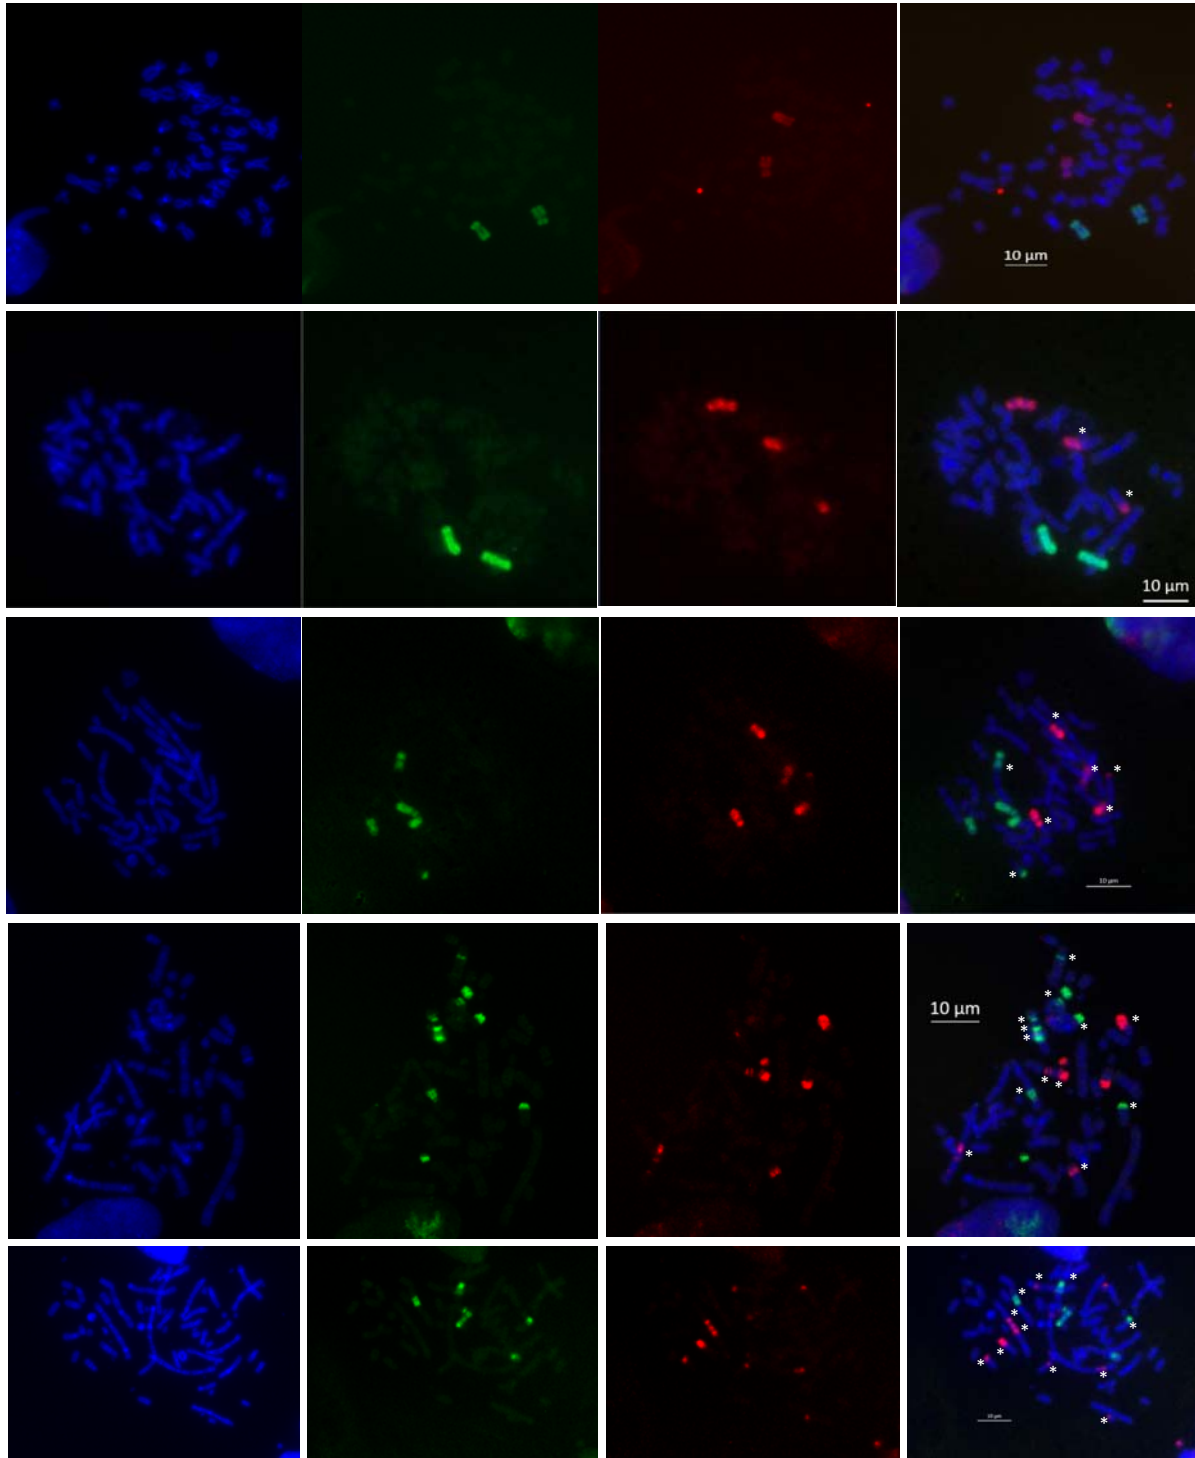

**Supplementary Figure 4.** Representative chromosome spreads scored in *Fig.4a*. Translocations in Chromosomes 8 (green probe) or 11 (red probe) are indicated with white asterisks. Scale bars 10 $\mu$ M. A metaphase spread without Chr8 or Chr 11 translocations is shown in the top panel.

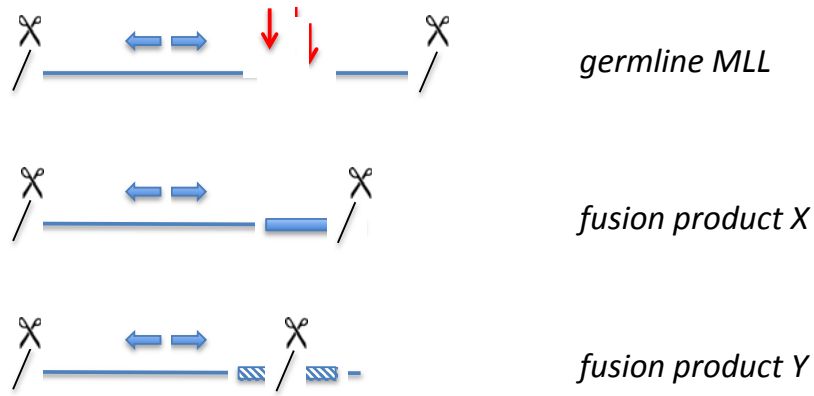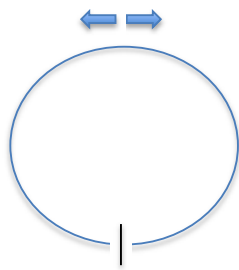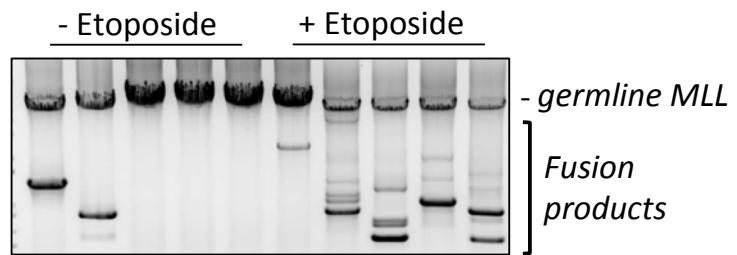

**Supplementary Figure 5.** Inverse PCR strategy for the isolation of *MLL* translocation partners. Red arrows indicate the *MLL* BCR hotspot for translocatons. Each lane is a single PCR from 40ng of genomic DNA processed as indicated (see experimental procedures for details).

**Fig.2A**

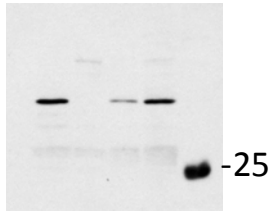

Anti-TDP2

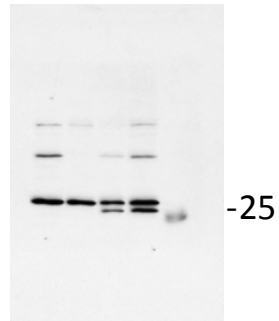

Anti-H1.2

**Fig.2D**

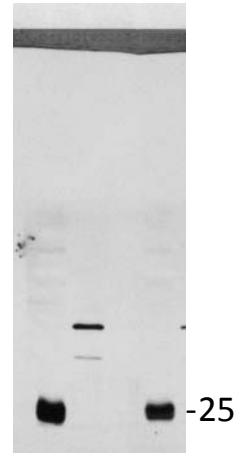

Anti-TDP2

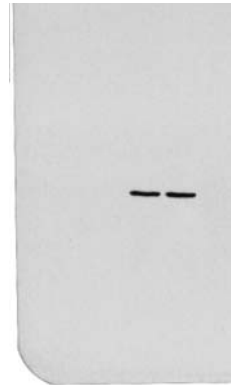

Anti-Actin

**Fig.3D**

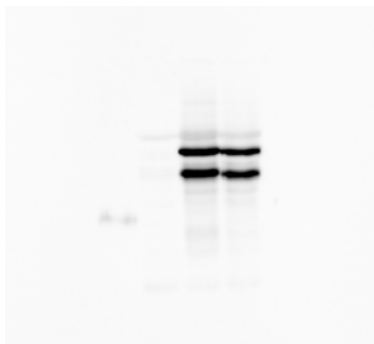

Anti-TDP2

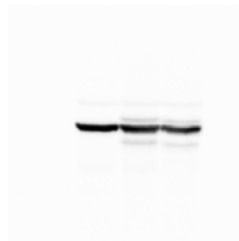

Anti-Actin

**Supplementary Figure 6.** Full blots from which the indicated figure panels were generated

### 2.1. Total aberrations

| <i>TDP2</i> |       | -/-     | -/-     | +/+     | +/+     |
|-------------|-------|---------|---------|---------|---------|
| <i>TDP2</i> | Etop. | 0       | 50      | 0       | 50      |
| -/-         | -     | -       | < 0.001 | 0.994   | 0.421   |
| -/-         | +     | < 0.001 | -       | < 0.001 | < 0.001 |
| +/+         | -     | 0.994   | < 0.001 | -       | 0.585   |
| +/+         | +     | 0.421   | < 0.001 | 0.585   | -       |

### 2.2. Total chromosome aberrations

| <i>TDP2</i> |       | -/-   | -/-   | +/+   | +/+   |
|-------------|-------|-------|-------|-------|-------|
| <i>TDP2</i> | Etop. | 0     | 50    | 0     | 50    |
| -/-         | -     | -     | 0.002 | 0.995 | 0.993 |
| -/-         | +     | 0.002 | -     | 0.001 | 0.005 |
| +/+         | -     | 0.995 | 0.001 | -     | 0.956 |
| +/+         | +     | 0.993 | 0.005 | 0.956 | -     |

### 2.3. Total chromatid aberrations

| <i>TDP2</i> |       | -/-     | -/-     | +/+     | +/+     |
|-------------|-------|---------|---------|---------|---------|
| <i>TDP2</i> | Etop. | 0       | 50      | 0       | 50      |
| -/-         | -     | -       | < 0.001 | 0.984   | 0.496   |
| -/-         | +     | < 0.001 | -       | < 0.001 | < 0.001 |
| +/+         | -     | 0.984   | < 0.001 | -       | 0.727   |
| +/+         | +     | 0.496   | < 0.001 | 0.727   | -       |

### 2.4. Total abnormal cells

| <i>TDP2</i> |       | -/-     | -/-     | +/+     | +/+     |
|-------------|-------|---------|---------|---------|---------|
| <i>TDP2</i> | Etop. | 0       | 50      | 0       | 50      |
| -/-         | -     | -       | < 0.001 | 0.993   | 0.356   |
| -/-         | +     | < 0.001 | -       | < 0.001 | < 0.001 |
| +/+         | -     | 0.993   | < 0.001 | -       | 0.523   |
| +/+         | +     | 0.356   | < 0.001 | 0.523   | -       |

**Supplementary Table 1.** Pairwise p values for comparison of ANOVA levels (Tukey simultaneous test)



| Band | Enzyme | Sample   | Location                          | Cytogenetic Band | bp in junction | Junction                                           |
|------|--------|----------|-----------------------------------|------------------|----------------|----------------------------------------------------|
| 1    | Bgl2   | TDP2 +/- | TTC7A                             | 2p21             | 4              | ACTCAGGAGAGGGCAC* <u>ACAG</u> *ACTATAGTAATTTTCAT   |
| 2    | Bgl2   | TDP2 +/- | GRAMD1B                           | 11q24.1          | 2              | ACTCAGGAACCTACTCAG* <u>TG</u> *ACCAAAGCTCTCCAGCC   |
| 3    | Bgl2   | TDP2 -/- | ST6GALNAC5                        | 1p31.1           | 0              | GTTTCACCCCTCCTTAAAAGT*TAGTTGTTCAATTCATATTG         |
| 4    | Bgl2   | TDP2 +/- | SNX32                             | 11q13.1          | 1              | AGGCAGGCCAGCATAGGCT* <u>G</u> *TATCACCCAAACAAAATGG |
| 5    | Bgl2   | TDP2 +/- | NPTN                              | 15q24.1          | 0              | TCATTAGATTCCCTTATTTTC*TTGTTCAATTCATATTGAAT         |
| 6    | Bgl2   | TDP2 +/- | PVRL1                             | 11q23.3          | 4              | AGTTGGGGTCTTGCC* <u>TAGG</u> *AATGTTTCATTATGTA     |
| 7    | Bgl2   | TDP2 +/- | RAB11FIP3                         | 16p13.3          | ?              |                                                    |
| 8    | Bgl2   | TDP2 -/- | FAT4                              | 4q28.1           | ?              |                                                    |
| 9    | Bgl2   | TDP2 -/- | PMFBP1                            | 16q22.2          | ?              |                                                    |
| 10   | Bgl2   | TDP2 -/- | CNTN5                             | 11q22.1          | 2              | GTAGTGCCTGGCATCAGG* <u>AA</u> *TAGCATCCCTTTTAATAG  |
| 11   | Bgl2   | TDP2 -/- | ARHGAP32                          | 11q24.3          | 1              | GAAGCAGCATGCCACTGCA* <u>A</u> *TTTCTTCCACCAACAGAA  |
| 12   | Bgl2   | TDP2 -/- | SLC35F3                           | 1q42.2           | ?              |                                                    |
| 13   | Bgl2   | TDP2 -/- | Intergenic (CUL5/ACAT1)           | 11q22.3          | ?              |                                                    |
| 14   | Sacl   | TDP2 +/- | C1orf127                          | 1p36.22          | ?              |                                                    |
| 15   | Sacl   | TDP2 +/- | LOC105369428                      | 11q14.3          | ?              |                                                    |
| 16   | Sacl   | TDP2 +/- | KMT2A                             | 11q23.3          | ?              |                                                    |
| 17   | Sacl   | TDP2 +/- | Intergenic (GRIP1 promoter)       | 12q14.3          | ?              |                                                    |
| 18   | Sacl   | TDP2 +/- | CNTN6                             | 3p26.3           | 3              | CTCTCACTAGGTGAAG* <u>ATT</u> *CTCTGTACAACATCATAG   |
| 19   | Sacl   | TDP2 +/- | ATP8B4                            | 15q21.2          | ?              |                                                    |
| 20   | Sacl   | TDP2 -/- | CDKL44                            | 2p22.1           | ?              |                                                    |
| 21   | Sacl   | TDP2 -/- | Intergenic (DPY19L2/LOC100418730) | 12q14.2          | ?              |                                                    |
| 22   | Sacl   | TDP2 +/- | C11orf57                          | 11q23.1          | 2              | CGGCAGTGGCCTGGGCCA* <u>CA</u> *CTGGTCATGCTTTAGGAG  |
| 23   | Sacl   | TDP2 -/- | Intergenic                        | 16q21            | 3              | ATTTTCAGGAATTTGGG* <u>GAG</u> *GGGTACTTAGAATTCCTC  |
| 24   | Bgl2   | TDP2 +/- | Intergenic                        | 17p13.1          | ?              |                                                    |
| 25   | Bgl2   | TDP2 -/- | ZNF609                            | 15q22.31         | 0              | TTCTCCAGAGCCCTTCTCAC*GTAATTTTCATCCACAGAAAA         |
| 26   | Bgl2   | TDP2 +/- | ncRNA XR_251278.2                 | 2q35             | ?              |                                                    |
| 27   | Bgl2   | TDP2 +/- | ncRNA XR_918087.1                 | 1q25.1           | 5              | ATGTGGTAGTGGCAAA* <u>GAATC</u> *ATCATGGTTTGATAC    |
| 28   | Bgl2   | TDP2 -/- | Non-confirmed gene LOC105369266   | 16p11.2          | ?              |                                                    |
| 29   | Bgl2   | TDP2 +/- | Intergenic                        | 4p15.1           | ?              |                                                    |
| 30   | Bgl2   | TDP2 +/- | SVPE1                             | 9q31.3           | 0              | AGGGGTTTGGAGCTAATGAA*ACCCTGGGTGTTATAGGAAC          |
| 31   | Bgl2   | TDP2 -/- | NRXN1                             | 2p16.3           | ?              |                                                    |
| 32   | Bgl2   | TDP2 -/- | Intergenic                        | 2p11.1           | ?              |                                                    |
| 33   | Bgl2   | TDP2 -/- | Intergenic                        | 3p24.1           | ?              |                                                    |
| 34   | Bgl2   | TDP2 -/- | KMT2A                             | 11q23.3          | 2              | CCTCAGCTTCTCAAGAGT* <u>AG</u> *TCAGTTCACAAACAGTGA  |
| 35   | Bgl2   | TDP2 +/- | Intergenic                        | 5q11.2           | 0              | GATTCACATGAAGTTAAGG*GAAGTCAAGATTCCTAAGCC           |
| 36   | Bgl2   | TDP2 +/- | COL19A1                           | 6q13             | ?              |                                                    |
| 37   | Bgl2   | TDP2 +/- | HNRNPUL2                          | 11q12.3          | ?              |                                                    |
| 38   | Bgl2   | TDP2 +/- | Intergenic                        | 5p14.1           | ?              |                                                    |
| 39   | Bgl2   | TDP2 +/- | LOC101927902                      | 7q22.3           | ?              |                                                    |
| 40   | Bgl2   | TDP2 -/- | PDGFC                             | 4q32.1           | ?              |                                                    |
| 41   | Bgl2   | TDP2 -/- | Intergenic FOSB/RTN2              | 19q13.32         | ?              |                                                    |
| 42   | Bgl2   | TDP2 -/- | Intergenic                        | 14q32.12         | ?              |                                                    |
| 43   | Bgl2   | TDP2 -/- | FGD4                              | 12p11.21         | ?              |                                                    |

**Supplementary Table 2. Distribution of genomic translocations detected by iPCR.** Cytogenetic bands were assigned by *GeneCards Human Gene Database*. SNX32 and NPTN, together with the MLL partner, were isolated from a single PCR band in which two translocation events had happened.
